# Supplementary material
Source: Springer Nature journal article supplement (https://www.springermedizin.de/resource/supplementary/12968_2009_510_MOESM3_ESM.pdf/9579140)

**A**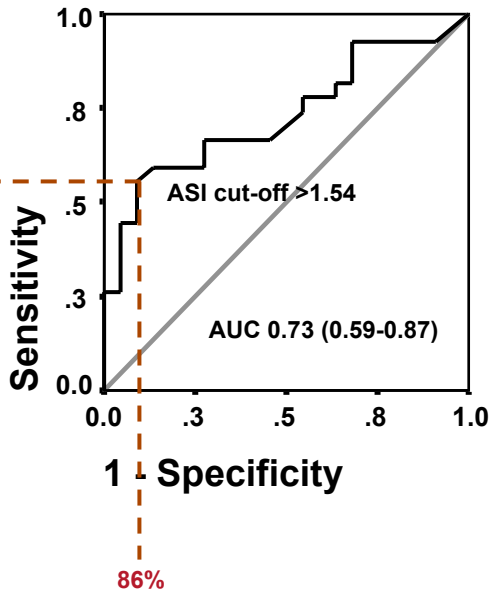**B**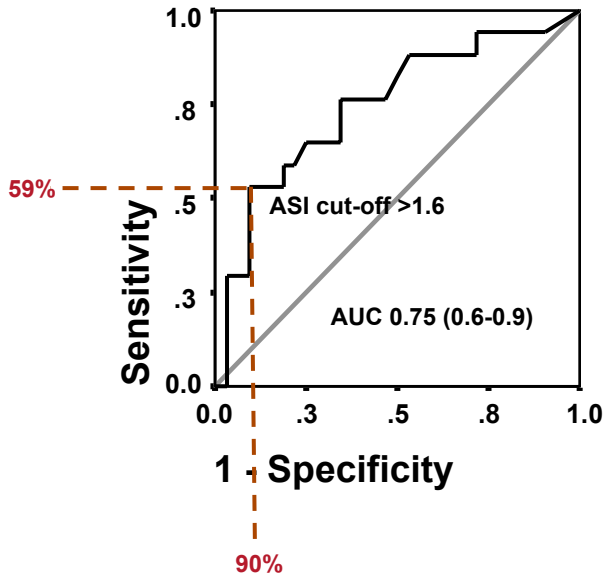

Supplement: MOESM3 [file 9579140]
